# Supplementary material for: CGG repeats in the human FMR1 gene regulate mRNA localization and cellular stress in developing neurons
Source: PubMed Central journal article supplement — Cell Rep. Author manuscript; Available in PMC 2024 Jul 12. (PMC11240841; doi:10.1016/j.celrep.2024.114330), 2024-06-11
Supplement: NIHMS2005242-supplement-2.pdf [file NIHMS2005242-supplement-2.pdf]

**Table S1.** CGG repeat lengths in the *FMR1* 5' UTR across different species**Non-Primate Mammals**

| Species                                                       | Repeat Length | Species                                                     | Repeat Length |
|---------------------------------------------------------------|---------------|-------------------------------------------------------------|---------------|
| <i>Microtus agrestis</i> (vole) <sup>1</sup>                  | 4             | <i>Carollia perspicillata</i> (bat) <sup>1</sup>            | 9             |
| <i>Bos taurus</i> (cow) <sup>1</sup>                          | 4             | <i>Mus caroli</i> (mouse) <sup>1</sup>                      | 9             |
| <i>Ovis aries</i> (sheep) <sup>1</sup>                        | 4             | <i>Mus musculus</i> (mouse) <sup>1</sup>                    | 9             |
| <i>Chaetophractus villosus</i> (hairy armadillo) <sup>1</sup> | 4             | <i>Hippopotamus amphibus</i> (hippo) <sup>3</sup>           | 9             |
| <i>Mesocricetus auratus</i> (hamster) <sup>1</sup>            | 5             | <i>Bandicota bengalensis</i> (Indian mole rat) <sup>3</sup> | 9             |
| <i>Stenella plagiodon</i> (dolphin) <sup>1</sup>              | 5             | <i>Cavia porcellus</i> (Guinea pig) <sup>3</sup>            | 9             |
| <i>Ornithorhynchus anatinus</i> (platypus) <sup>1</sup>       | 5             | <i>Mus spretus</i> (mouse) <sup>1</sup>                     | 10            |
| <i>Herpestes ichneumon</i> (mongoose) <sup>1</sup>            | 6             | <i>Canis familiaris</i> (dog) <sup>1</sup>                  | 11            |
| <i>Rattus norvegicus</i> (rat) <sup>1</sup>                   | 6             | <i>Ammospermophilus harrisi</i> (squirrel) <sup>1</sup>     | 11            |
| <i>Panthera leo</i> (lion) <sup>1</sup>                       | 8             | <i>Cricetulus griseus</i> (Chinese hamster) <sup>3</sup>    | 11            |
| <i>Myotis yumaneni</i> (bat) <sup>1</sup>                     | 8             | <i>Micronycteris hirsuta</i> (bat) <sup>1</sup>             | 12            |
| <i>Equus caballus</i> (horse) <sup>3</sup>                    | 8             | <i>Sus scrofa</i> (wild boar) <sup>1</sup>                  | 12            |
| <i>Felis doesticus</i> (cat) <sup>1</sup>                     | 9             | <i>Sus domesticus</i> (mini pig) <sup>4</sup>               | 14            |
| <i>Euarctos americanus</i> (polar bear) <sup>1</sup>          | 9             | <i>Artibeus obscura</i> (bat) <sup>1</sup>                  | 18            |
| <i>Zalophus californianus</i> (seal) <sup>1</sup>             | 9             | <i>Artibeus jamaicensis</i> (bat) <sup>1</sup>              | 19            |

**Non-Human Primates**

| Species                                                          | Repeat Length |
|------------------------------------------------------------------|---------------|
| <i>Pan troglodytes</i> (chimpanzee) <sup>1</sup>                 | 20-38         |
| <i>Pan paniscus</i> (bonobo) <sup>1</sup>                        | 37, 39        |
| <i>G. gorilla gorilla</i> (gorilla) <sup>1</sup>                 | 22,26         |
| <i>G. gorilla beringel</i> (gorilla) <sup>1</sup>                |               |
| <i>G. gorilla graueri</i> (gorilla) <sup>1</sup>                 |               |
| <i>Pongo pygmaeus</i> (orangutan) <sup>1</sup>                   | 26            |
| <i>Hylobates lar</i> (gibbon) <sup>1</sup>                       | 22,24         |
| <i>Hylobates syndactylus</i> (siamang) <sup>1</sup>              | 24            |
| <i>Papio</i> (baboon) <sup>1</sup>                               | 32            |
| <i>Macaca mulatta</i> (rhesus monkey) <sup>1,2</sup>             | 25,33         |
| <i>Mandrillus leucophaeus</i> (drill) <sup>1</sup>               | 24            |
| <i>Allenopithecus nigroviridis</i> (Allen's monkey) <sup>1</sup> | 20            |
| <i>Nasalis larvatus</i> (proboscis monkey) <sup>1</sup>          | 7             |
| <i>Rhinopithecus roxellana</i> (Golden monkey) <sup>1</sup>      | 7             |
| <i>Pygathrix nemaeus</i> (Douc's Langur) <sup>1</sup>            | 10            |
| <i>Colobus guereza</i> (Colobus monkey) <sup>1</sup>             | 8             |
| <i>Saimiri sciruesus</i> (squirrel monkey) <sup>1</sup>          | 25            |
| <i>Lentopithecus saguinus</i> (marmoset) <sup>1</sup>            | 9             |
| <i>Nycticebus coucang</i> (Slow Loris) <sup>1</sup>              | 17,18         |
| <i>Lemus fulvianus</i> (lemur) <sup>1</sup>                      | 14            |
| <i>Varecia variegata</i> (ruffed lemur) <sup>1</sup>             | 7             |

<sup>1</sup>Echler et al (1995) *Nature Genetics*<sup>2</sup>Garcia Arocena et al (2003) *Hum Gen*<sup>3</sup>Deelen et al (1994) *Am J Med Gen*<sup>4</sup>Madsen et al (2007) *Neurogenetics*
