# Supplementary material for: CGG repeats in the human FMR1 gene regulate mRNA localization and cellular stress in developing neurons
Source: PubMed Central journal article supplement — Cell Rep. Author manuscript; Available in PMC 2024 Jul 12. (PMC11240841; doi:10.1016/j.celrep.2024.114330), 2024-06-11
Supplement: NIHMS2005242-supplement-3.pdf [file NIHMS2005242-supplement-3.pdf]

**Table S2. Oligonucleotide primers and RNAs used in this study.**

| <b>Sequences for construction of plasmids used for genome editing</b> |                                                    |
|-----------------------------------------------------------------------|----------------------------------------------------|
| sgRNA sequence                                                        | GCCAGGGGGCGTGCGGCAGCG                              |
| Left homology arm primer (F)                                          | <b>CAAGCTTGGTACCGAGCTCGG</b> AGGGTCTGAGGAAAGGCTCAC |
| Left homology arm primer (R)                                          | AGGCCAGCGCTGCCGCACGCCCTGGCA                        |
| Right homology arm primer (F)                                         | CGTGCGGCAGCGCTGGCCTCGAGCGCCCGCAGCCACCTCT           |
| Right homology arm primer (R)                                         | <b>CCTCTAGATGCATGCTCGAGCG</b> TGCCGACTACCGCTTCTTAC |

| <b>Primers used for clone screening and Sanger sequencing</b> |                               |
|---------------------------------------------------------------|-------------------------------|
| Clone Screening - Forward                                     | TCAGGCGCTCAGCTCCGTTTTCGGTTTCA |
| Clone Screening - Reverse                                     | AAGCGCCATTGGAGCCCCGCACTTCC    |
| Sequencing PCR – Forward                                      | TTCGGTTTCACTTCCGGTGGAG        |
| Sequencing PCR – Reverse                                      | GTTAGGGTCTTCTGAAACTTTTGG      |
| Sequencing Primer                                             | CGTCACTTAGCGCCGATTTCC         |

| <b>Primers used for CRISPR off-target analysis</b> |                       |
|----------------------------------------------------|-----------------------|
| <b>Predicted Site #1 (Chr2: 240043328)</b>         |                       |
| Sequence                                           | CCGAGGGGGCGTGCGGCAGCG |
| Forward Primer                                     | GCCGCATCTCTTTAGTGTCC  |
| Reverse Primer                                     | GAGAAGCAGGCTTTGTTTGC  |
| Nested Sequencing Primer                           | CTGGCCTGCGTCACAGAG    |
| <b>Predicted Site #2 (Chr4: 154712220)</b>         |                       |
| Sequence                                           | CTTCCGGGGCGTGCGGCAGCG |
| Forward Primer                                     | CCCCCTTCCCAACATAAACT  |
| Reverse Primer                                     | TCAATTGGACCGGTCTTAGC  |
| Nested Sequencing Primer                           | ATAAGGGCCCTCTCGCTTT   |
| <b>Predicted Site #3 (Chr7: 1200361)</b>           |                       |
| Sequence                                           | CCAGGGGGCGGGGGGCAGCG  |
| Forward Primer                                     | AGCACCTAGATCCCCCAGTT  |
| Reverse Primer                                     | TTTCTGCAGAGATGGGGTCT  |
| Nested Sequencing Primer                           | AGGCTGGTCTCCATGTCCT   |
| <b>Predicted Site #4 (Chr5: 153174276)</b>         |                       |
| Sequence                                           | CAAGGGCGAGTGCGGCAGCG  |
| Forward Primer                                     | AGCACCTAGATCCCCCAGTT  |
| Reverse Primer                                     | TTTCTGCAGAGATGGGGTCT  |
| Nested Sequencing Primer                           | AGGCTGGTCTCCATGTCCT   |
| <b>Predicted Site #5 (ChrX: 107019364)</b>         |                       |
| Sequence                                           | CGAGGGTGCGAGCGGCAGCG  |
| Forward Primer                                     | AGGAGCTGAGAGCGAGTGAG  |
| Reverse Primer                                     | AGGGCGTCGTCTTCTGTA    |
| Nested Sequencing Primer                           | AGCACTGGGATATGACAGCA  |
