# Supplementary material for: CGG repeats in the human FMR1 gene regulate mRNA localization and cellular stress in developing neurons
Source: PubMed Central journal article supplement — Cell Rep. Author manuscript; Available in PMC 2024 Jul 12. (PMC11240841; doi:10.1016/j.celrep.2024.114330), 2024-06-11
Supplement: NIHMS2005242-supplement-4.pdf [file NIHMS2005242-supplement-4.pdf]

**Table S3: Results of human cell stress arrays**

| Protein:                                         | Interaction      | Treatment        | Genotype             |
|--------------------------------------------------|------------------|------------------|----------------------|
| ADAMTS1                                          | <b>p = 0.042</b> | p = 0.191        | <b>p = 0.019</b>     |
| BCL2                                             | p = 0.053        | p = 0.399        | <b>p = 0.004</b>     |
| CA9                                              | <b>p = 0.021</b> | p = 0.456        | <b>p = 0.013</b>     |
| CITED2                                           | p = 0.168        | p = 0.299        | p = 0.503            |
| COX2                                             | <b>p = 0.018</b> | p = 0.291        | <b>p = 0.045</b>     |
| Cytochrome C (CYCS)                              | <b>p = 0.015</b> | p = 0.073        | <b>p = 0.001</b>     |
| DKK4                                             | p = 0.52         | p = 0.213        | p = 0.999            |
| FABP1                                            | <b>p = 0.159</b> | <b>p = 0.035</b> | p = 0.291            |
| HIF1A (HIF1 $\alpha$ )                           | p = 0.122        | p = 0.065        | <b>p = 0.001</b>     |
| EPAS1 (HIF2 $\alpha$ )                           | <b>p = 0.002</b> | p = 0.482        | <b>p = 0.001</b>     |
| Phosphoylated-HSPB1 (HSP27) (S78/S82)            | <b>p = 0.016</b> | p = 0.714        | <b>p = 0.012</b>     |
| HSPD1 (HSP60)                                    | p = 0.918        | p = 0.621        | p = 0.332            |
| HSPA1A (HSP70)                                   | p = 0.166        | p = 0.469        | p = 0.413            |
| IDO1                                             | p = 0.916        | p = 0.183        | p = 0.149            |
| Phosphorylated-Pan JNK (MAPK8) (T183/Y185)       | p = 0.067        | p = 0.181        | <b>p &lt; 0.0001</b> |
| NFKB1                                            | p = 0.884        | p = 0.27         | p = 0.291            |
| CDKN1A (p21/CIP1)                                | p = 0.221        | p = 0.326        | <b>p = 0.130</b>     |
| CDKN1B (p27)                                     | p = 0.212        | p = 0.079        | <b>p &lt; 0.0001</b> |
| Phosphorylated-p38 $\alpha$ (MAPK14) (T180/Y182) | <b>p = 0.020</b> | p = 0.153        | <b>p &lt; 0.0001</b> |
| Phosphorylated -p53 (TP53) (S46)                 | <b>p = 0.002</b> | p = 0.666        | <b>p = 0.007</b>     |
| PON1                                             | p = 0.488        | p = 0.673        | p = 0.796            |
| PON2                                             | p = 0.634        | p = 0.712        | p = 0.677            |
| PON3                                             | p = 0.242        | p = 0.242        | p = 0.645            |
| TXN (Thioredoxin)                                | <b>p = 0.120</b> | p = 0.193        | <b>p = 0.006</b>     |
| SIRT2                                            | p = 0.589        | p = 0.987        | p = 0.161            |
| SOD2                                             | p = 0.443        | p = 0.338        | p = 0.338            |

Note: Statistical analyses were performed using two-way ANOVA main effects analysis (effect of genotype, treatment, or genotype x treatment interaction)
